# Supplementary material for: Inhibition of lysosomal protease cathepsin D reduces renal fibrosis in murine chronic kidney disease
Source: PubMed Central journal article supplement (PMC4735715; doi:10.1038/srep20101), 2016-02-02
Supplement: srep20101-s1.pdf [file srep20101-s1.pdf]

# **Inhibition of lysosomal protease cathepsin D reduces renal fibrosis in murine chronic kidney disease**

Christopher Fox, Pasquale Cocchiaro, Fiona Oakley, Rachel Howarth, Krystena Callaghan, Jack Leslie, Saimir Luli, Katrina M Wood, Federica Genovese, Neil S Sheerin, Anna Moles\*

**Supplementary Figure S1: Cathepsin D expression in UUO time-course**

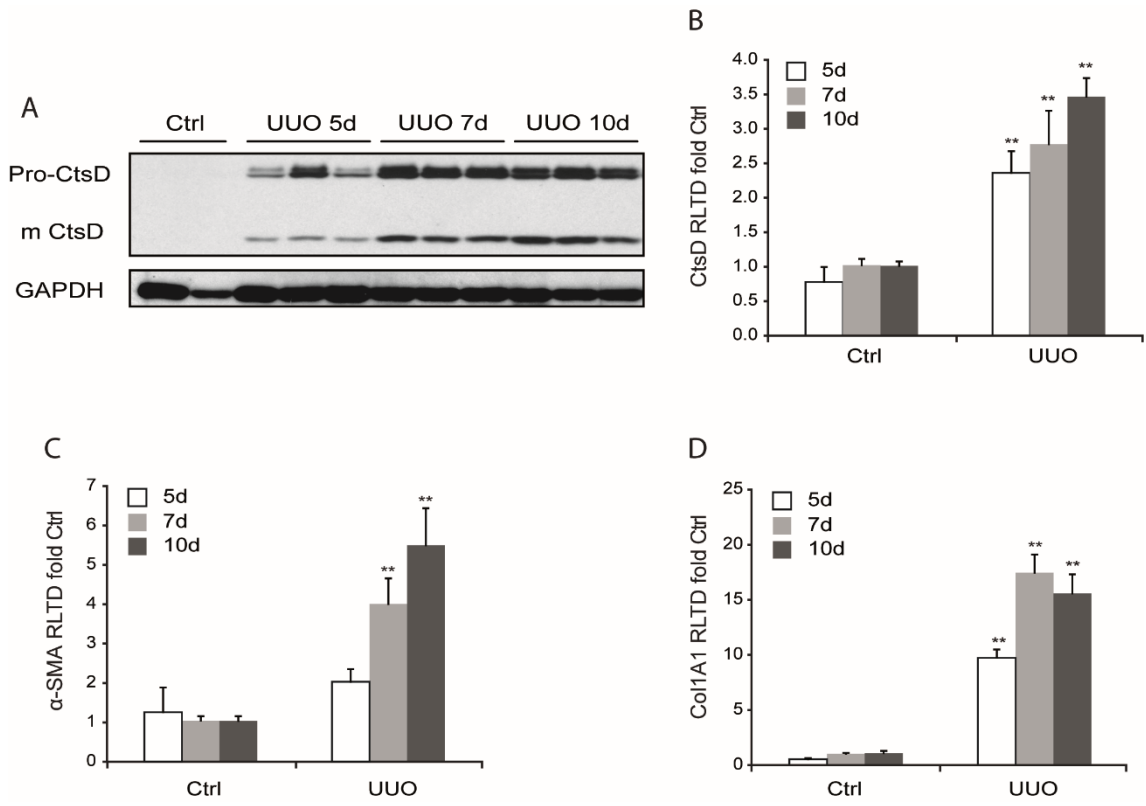

**Supplementary Figure S2: Cathepsin D and UPA co-localize within the lysosomes in fibrotic IRI kidneys**

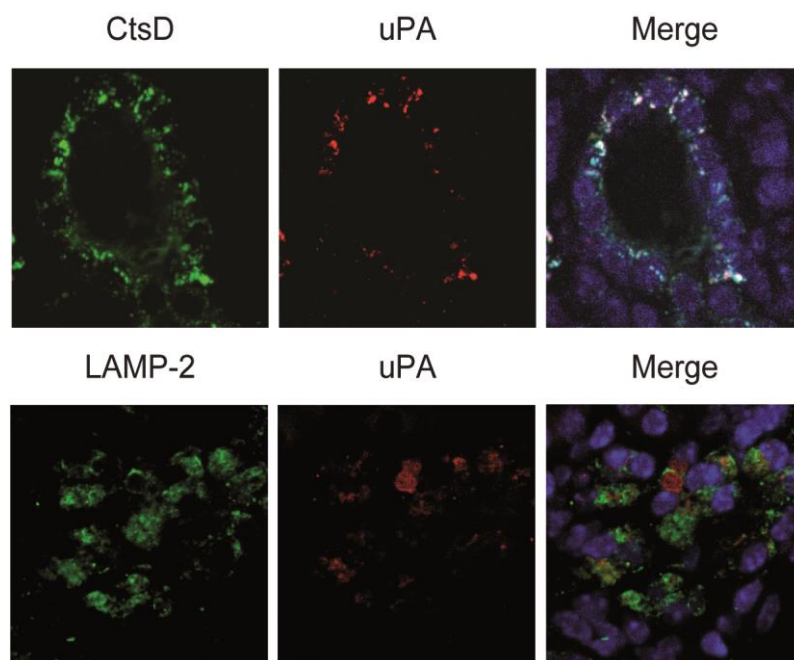

**Supplementary Figure S3: Pepstatin A enhances UPA secretion by human tubular epithelial**

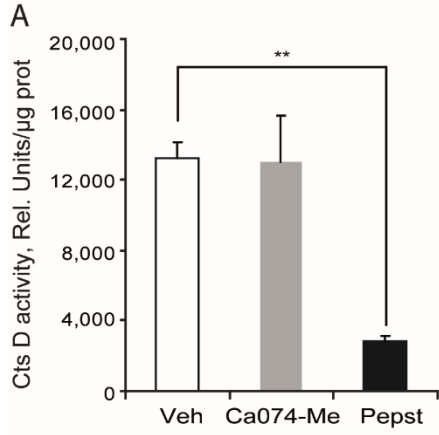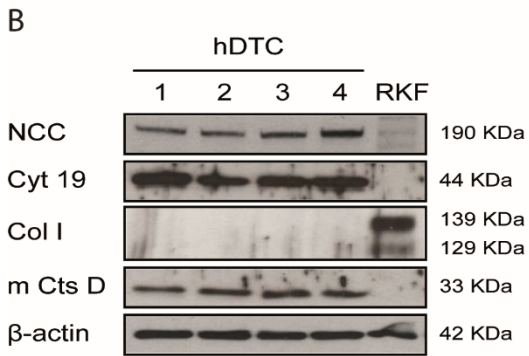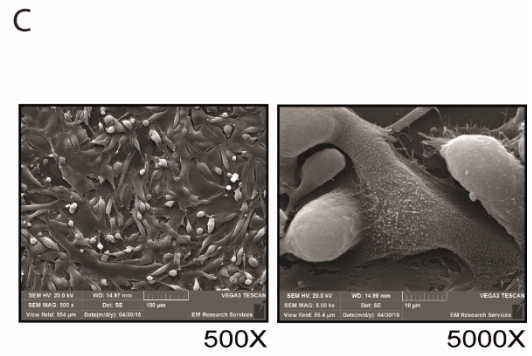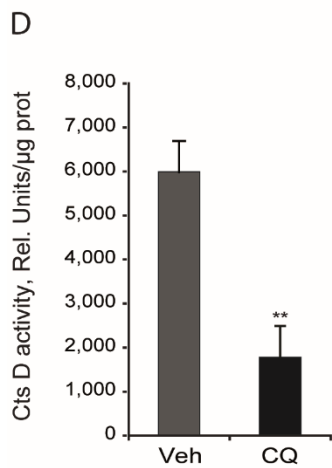

## **SUPPLEMENTARY FIGURE LEGENDS**

### **Supplementary Figure S1: Cathepsin D expression in UO time course**

CtsD and GAPDH western blot **(A)** from kidney lysates. CtsD,  $\alpha$ -SMA, Col1A1 mRNA expression **(B, C, D)** from contralateral and 5, 7, 10 days UO kidneys. N=6, t-test, \*P  $\leq$  0.05 or \*\*P  $\leq$  0.01.

### **Supplementary Figure S2: Cathepsin D and UPA co-localize within the lysosomes in fibrotic IRI kidneys**

Representative dual staining confocal pictures of CtsD/UPA or LAMP-2/UPA of a single epithelial tubular cell from fibrotic vehicle IRI kidneys sections. CtsD or LAMP-2 (green), UPA (red) and merge with DAPI (blue). Confocal processing was performed by Image J software. In this study ischemia was performed for 35 minutes and kidneys were reperfused for 28 days. Animals were treated with vehicle or Pepstatin A 20mg/Kg from day 5. N=6, 1 way ANOVA, \*P  $\leq$  0.05 or \*\*P  $\leq$  0.01.

### **Supplementary Figure S3: Pepstatin A enhances UPA secretion by human tubular epithelial**

CtsD fluorometric activity assay in HKC-8 cell lysates **(A)** from HKC-8 cells treated with vehicle, 10 $\mu$ M Ca074-Me or 10 $\mu$ g/mL Pepstatin A for 48 hrs. Anti-Thiazide-Sensitive NaCl Cotransporter (NCC), Cytokeratin-19, Collagen type 1, CtsD and  $\beta$ -actin Western Blot in hDTC lysates from 4 different preparations at passage 2 and NRK-49F rat fibroblast cell line (RKF) lysates **(B)**. Representative electron microscopy images of hDTC at passage 3 **(C)**. Pictures were taken at 500X and 5000X. CtsD fluorometric activity in kidney lysates of 15 days UO

vehicle and chloroquine treated mice assessed by the cleavage of a specific fluorescently labelled substrate (**D**). Experiments were repeated at least 3 times.

t-test, \*P ≤ 0.05 or \*\*P ≤ 0.01.

## **SUPPLEMENTARY TABLES**

Supplementary table 1: Detailed instructions for immunohistochemistry staining

| Antigen retrieval                            | Primary antibody                                                          |
|----------------------------------------------|---------------------------------------------------------------------------|
| 20µg/mL<br>Proteinase K                      | Rabbit polyclonal Collagen IV<br>(ab19808, Abcam)                         |
| 20µg/mL<br>Proteinase K                      | Goat anti-collagen III<br>(1330-01, Southern Biotech)                     |
| Sodium citrate antigen<br>unmasking solution | Monoclonal Anti-Actin, $\alpha$ -Smooth<br>Muscle (F3777, Sigma- Aldrich) |
| Sodium citrate antigen<br>unmasking solution | Rabbit polyclonal anti-Cathepsin D<br>(sc10725, St Cruz Biotechnology)    |
| Sodium citrate antigen<br>unmasking solution | Rabbit polyclonal anti-Cathepsin B<br>(NBP1-19797, Novus Biologicals)     |

Supplementary table 2: Primary antibody list

| Dual immunofluorescence                                                           | WB                            |
|-----------------------------------------------------------------------------------|-------------------------------|
| AP-2 $\mu$ 1 (sc-49150, St Cruz)                                                  | $\alpha$ -SMA (A5228, Sigma)  |
| Aquaporin-1 (sc-9878, St Cruz)                                                    | $\beta$ -actin (A5316, Sigma) |
| CtsB (sc-13985, St Cruz)                                                          | CtsB (sc-13985, St Cruz)      |
| CtsD (sc-6486, St Cruz)                                                           | CtsD (sc-6486, St Cruz)       |
| LAMP-2 (ab13524, Abcam)                                                           | CtsL (ab133641, Abcam)        |
| Anti-Thiazide-Sensitive NaCl<br>Cotransporter or NCC (AB3553, Merck<br>Millipore) | GAPDH (ab22555, Abcam)        |
| UPA (sc-14019, St Cruz)                                                           | UPA (sc-14019, St Cruz)       |



Supplementary table 3: Mouse primer sequences

| <b>Gene (GenBank Accession)</b> | <b>Primer sequence</b>              |
|---------------------------------|-------------------------------------|
| α-SMA (NM_007392)               | Fw: 5'-TCAGCGCCTCCAGTTCCT-3'        |
|                                 | Rv: 5'-AAAAAAAAACCACGTAACAAATCAA-3' |
| Col1A1 (NM_007742)              | Fw: 5'-TTCACCTACAGCACGCTTGTG-3'     |
|                                 | Rv: 5'-GATGACTGTCTTGCCCCAAGTT-3'    |
| Col 3A1 (NM_009930)             | Fw: 5'-CTGTAACATGGAAACTGGGGAAA-3'   |
|                                 | Rv: 5'-CCATAGCTGAACTGAAAACCACC-3'   |
| Col 4A1 (NM_009931)             | Fw: 5'-TCCGGGAGAGATTGGTTTCC-3'      |
|                                 | Rv: 5'-CTGGCCTATAAGCCCTGGT-3'       |
| CtsB (NM_007798)                | Fw: 5'-TCCTTGATCCTTCTTTCTTGCC-3'    |
|                                 | Rv: 5'-ACAGTGCCACACAGCTTCTTC-3'     |
| CtsD (NM_009983)                | Fw: 5'-GCTTCCGGTCTTTGACAACCT-3'     |
|                                 | Rv: 5'-CACCAAGCATTAGTTCTCCTCC-3'    |
| CtsL (NM_009984)                | Fw: 5'-TCGGTGACATGACCAATGAGG-3'     |
|                                 | Rv: 5'-AGCGGTTCTGAAAAAGCCT-3'       |
| Cystatin B (NM_007793)          | Fw: 5'-AGGTGAAGTCCCAGCTTGAAT-3'     |
|                                 | Rv: 5'-GTCTGATAGGAAGACAGGGTCA-3'    |
| Cystatin C (NM_009976)          | Fw: 5'-AGGAGGCAGATGCCAATGAG-3'      |
|                                 | Rv: 5'-GGGCTGGTCATGGAAAGGA-3'       |
